# Supplementary material
Source: Royal Society of Chemistry journal article supplement (doi:10.1039/d6ob00719h)
Supplement: d6ob00719h1.pdf [file d6ob00719h1.pdf]

## Supplementary Information

### **Sortase A-Mediated Hydrazinolysis Generates Homogeneous N-Terminal GL Proteins for OaAEP1-Catalyzed Bioconjugation**

Junjiang Li <sup>a</sup>, Tingting Cui <sup>\*a</sup>, Jian Sun <sup>a</sup> and Yi-Ming Li <sup>\*a</sup>

<sup>a</sup> School of Food and Biological Engineering, Engineering Research Center of Bioprocess, Ministry of Education, Hefei University of Technology, Hefei 230009, China

\* To whom correspondence should be addressed: Tingting Cui, Yi-Ming Li (tingtingcui123@outlook.com; ymli@hfut.edu.cn)

---

## Table of contents

|                                                                                                                                           |   |
|-------------------------------------------------------------------------------------------------------------------------------------------|---|
| 1. Supplementary Methods.....                                                                                                             | 1 |
| 1.1 Reagents and materials.....                                                                                                           | 1 |
| 1.2 High-performance liquid chromatography (HPLC) and Mass spectrometry (MS) .....                                                        | 1 |
| 1.3 General procedure for solid phase peptide synthesis .....                                                                             | 2 |
| 1.4 Cell confocal imaging .....                                                                                                           | 2 |
| 2. Peptide synthesis methods.....                                                                                                         | 3 |
| 2.1 Synthesis of model peptide. ....                                                                                                      | 3 |
| 3. Protein expression and purification.....                                                                                               | 4 |
| 3.1 Protein Sequence:.....                                                                                                                | 4 |
| 3.2 Sortase A expression and purification.....                                                                                            | 5 |
| 3.2 OaAEP1 expression, purification and activation .....                                                                                  | 5 |
| 3.3 Ub-NCL, His <sub>6</sub> -LLLPEGL-Ub, nanobody-NCL-His <sub>6</sub> , His <sub>6</sub> -LLLPEGL-GFP expression and purification ..... | 6 |
| 4. Sortase A-mediated hydrazinolysis reaction and OaAEP1-mediated ligation...6                                                            |   |
| 4.1 Hydrazinolysis of model peptides .....                                                                                                | 6 |
| 4.2 Hydrazinolysis of protein.....                                                                                                        | 6 |
| 4.3 Protein-protein ligation .....                                                                                                        | 7 |
| 4.4 Purification of hydrazinolysis and ligation proteins .....                                                                            | 7 |
| 5. Supplementary figures on hydrazinolysis reaction monitoring/analysis and product characteristics.....                                  | 7 |

---

# 1. Supplementary Methods

## 1.1 Reagents and materials

All Fmoc-amino acids and ethyl cyanoglyoxylate-2-oxime (Oxyma) was purchased from GL Biochem. AM-Rink resin was purchased from Tianjin Nankai HECHENG S&T Co., Ltd. N,N'-Diisopropylcarbodiimide (DIC), trifluoroacetic acid (TFA) were purchased from energy-chemical. HClO<sub>4</sub>, anhydrous diethyl ether (Et<sub>2</sub>O), piperidine were purchased from Sinopharm Chemical Reagent Co., Ltd. N,N-dimethylformamide (DMF), dichloromethane (DCM), acetonitrile (HPLC grade) were purchased from Chengdu Kelong Chemical Co., Ltd. PKH26 were purchased from Bidepharm. A-431 and MCF-7 live cells were purchased from Servicebio. Glycerol, guanidine hydrochloride, urea, and imidazole were purchased from Sangon Biotech. PreCot Q 6FF, Welch Ultimate XB-C4 and XB-C18 were purchased from Welch Materials.

## 1.2 High-performance liquid chromatography (HPLC) and Mass spectrometry (MS)

The AM-Rink resin (0.05 mmol) was swelled in N,N-dimethylformamide (DMF, 4 mL) for 10 min. Subsequently, all Fmoc-protected amino acids (0.5 mmol) were added to the resin, and the mixture was shaken at 75 °C for 20 min to complete peptide chain assembly. Upon completion of peptide elongation, the resin was treated with a cleavage cocktail consisting of trifluoroacetic acid/triisopropylsilane/water (TFA/TIPS/H<sub>2</sub>O, v/v/v, 90:5:5) for 3 h. The resulting solution was concentrated under nitrogen blowing, followed by precipitation with cold anhydrous diethyl ether (Et<sub>2</sub>O). The precipitate was collected by centrifugation at 4000 rpm to afford the crude peptide. The crude product was further identified and purified by high-performance liquid chromatography-mass spectrometry (HPLC-MS).

---

### **1.3 General procedure for solid phase peptide synthesis**

The AM-Rink resin (0.05 mmol) was swollen in DMF (4 mL) for 10 min. All amino acids (0.5 mmol) were added to the resin and shaken at 75 °C for 20 minutes. After peptide assembly, the resin was treated with a solution (TFA/TIPS/water = 90/5/5) for 3 h. The solution was blown with N<sub>2</sub> and subsequently precipitated with cold Et<sub>2</sub>O. After that, it was centrifuged at 4000 rpm to obtain the crude peptide. The crude peptides were identified and purified by HPLC-MS.

### **1.4 Cell confocal imaging**

A431 and MCF-7 cells were seeded onto glass-bottomed culture dishes and incubated overnight at 37 °C in a 5% CO<sub>2</sub>. A431 and MCF-7 cells were stained with 2 μM red fluorescent dye PKH26 at 37 °C for 10 min, respectively. The stained cells were then incubated with 233 nM nanobody-GFP at 37 °C for 1 h, respectively. After incubation, the cells were washed three times with PBS supplemented with 0.05% glycerol, followed by fixation with pre-chilled methanol at -20 °C for 10 min. Images of the fixed cells were acquired using an LSM 880 confocal laser scanning microscope (Zeiss, Germany).

The essential imaging parameters were set as follows: excitation wavelengths at 488 nm and 543 nm; emission detection windows at 493–560 nm and 548–685 nm, respectively.

## 2. Peptide synthesis methods

### 2.1 Synthesis of model peptide.

model peptide **1a**: YALPETGLTAPEY

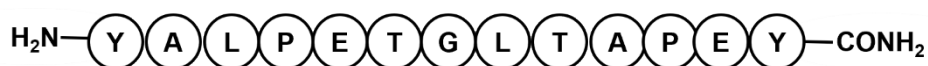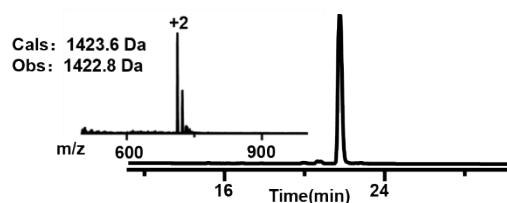

**Fig. S1.** Characterization of peptide **1a**: Structural diagram of peptide **1a**, RP-HPLC analysis of **1a** and ESI-MS spectrum of **1a**.

model peptide **1b**: YALLPETGLTAPEY

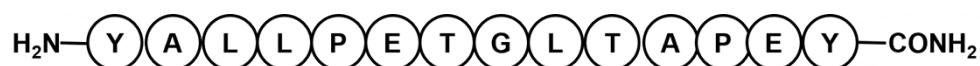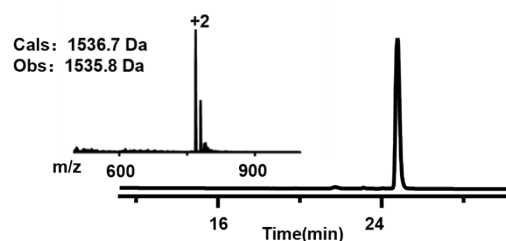

**Fig. S2.** Characterization of peptide **1b**: Structural diagram of peptide **1b**, RP-HPLC analysis of **1b** and ESI-MS spectrum of **1b**.

model peptide **1c**: YALLLPETGLTAPEY

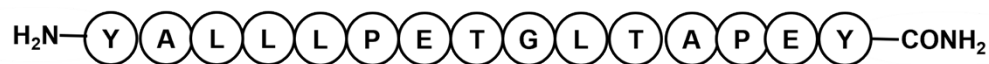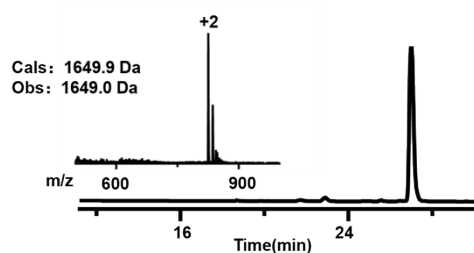

---

**Fig. S3.** Characterization of peptide **1c**: Structural diagram of peptide **1c**, RP-HPLC analysis of **1c** and ESI-MS spectrum of **1c**.

### **3. Protein expression and purification**

#### **3.1 Protein Sequence:**

**His<sub>6</sub>-LLLPEGL-Ub:** an His<sub>6</sub>-GGG-LLLPEGL motif was conjugated to the N-terminus of Ub.

#### **Amino acid sequence:**

MHHHHHHGGSLLLPETGLMQIFVKTLTGKTITLEVEPSDTIENVKAKIQD  
KEGIPPDQQRLLIFAGKQLEDGRTLSDYNIQKESTLHLVLRRLRGG

**Ub-NCL:** an NCL motif was conjugated to the C-terminus of Ub.

#### **Amino acid sequence:**

MQIFVKTLTGKTITLEVEPSDTIENVKAKIQDKEGIPPDQQRLLIFAGKQLE  
DGRTLSDYNIQKESTLHLVLRRLRGGNCL

**His<sub>6</sub>-LLLPEGL-GFP:** His<sub>6</sub>-GGG-LLLPEGL-GGGSGGGG motif was conjugated to the N-terminus of GFP(D244A).

#### **Amino acid sequence:**

MHHHHHHGGSLLLPETGLGGSGGGSVSKGEELFTGVVPIVELDGDVN  
GHKFSVRGEGEGDATNGKLT<sub>L</sub>KFICTTGKLPVPWPTLVTTLYGVQCFSRYP  
DHMKRHDFFKSAMPEGYVQERTISFKDDGTYKTRAEVKFEGDTLVNRIELKG  
IDFKEDGNILGHKLEYNFN<sub>S</sub>HN<sub>V</sub>YITADKQKNGIKANFKIRHNVEDG<sub>S</sub>VQLA  
DHYQQNTPIGDGPVLLPDNH<sub>L</sub>STQSVLSKDPNEKRDH<sub>M</sub>VLLEFVTAAGITH  
GMAELYK

**nanobody-NCL-His<sub>6</sub>:** an NCL-His<sub>6</sub> motif was conjugated to the C-terminus of nanobody.

#### **Amino acid sequence:**

---

MQVKLEESGGGSVQTGGSLRLTCAASGRTSRSYGMGWFRQAPGKEREF  
VSGISWRGDSTGYADSVKGRFTISRDNANTVDLQMNSLKPEDTAIYYCAAA  
AGSAWYGTLYEYDYWGQGTQVTVSSAAAEQKLISEEDLNGAANCLHHHHH  
H

**Full sequence of Sortase A:**

MQAKPQIPKDKSKVAGYIEIPDADIKEPVYPGPATREQLNRGVSF AEENE  
SLDDQNISIAGHTFIDRPNYQFTNLKAAKKGSMVYFKVGNETRKYKMTSIRN  
VKPTAVEVLDEQK GKDKQLTLITCDDYNEETGVWETRKIFVATEVKLEHHH  
HHH

**Full sequence of OaAEP1:**

MGM AHHHHHMQIFVKTLTGKTITLEVEPSDTIENVKAKIQDKEGIPPD  
QQLIFAGKQLEDGRTLSDYNIQKESTLHLVLR LRGGARDGDY LHPSEVSRF  
FRPQETNDDHGEDSVGTRWAVLIAGSKGYANYRHQAGVCHAYQILKRGGLK  
DENIVVFMYDDIAYNESNPRPGVIINSPHGS DVYAGVPKDYTGEEVNAKNFL  
AAILGNKSAITGGSGKVVDSPNDHIFIYYTDHGAAGVIGMPSKPYLYADELN  
DALKKKHASGTYSLVFYLEACESGSMFEGILPEDLN IYALTSTNTTESSWAY  
YCPAQENPPPPEYNVCLGDLFSVAWLEDS DVQNSWYETLNQQYHHVDKRIS  
HASHATQYGNLKLGEGLFVYMGSNPANDNYTSLDGNALTPSSIVVNQRDA  
DLLHLWEKFRKAPEGSARKEEAQTQIFKAMSHRVHIDSSIKLIGKLLFGIEKCT  
EILNAV RPAGQPLVDDWACLRLSLVGTFETHCGSLSEYGM RHTRTIANICNAGI  
SEEQMAEAASQACASIP

**3.2 Sortase A expression and purification**

Sortase A expression and purification were consistent with previously described.<sup>1,2</sup>

**3.2 OaAEP1 expression, purification and activation**

OaAEP1 expression, purification and activation were consistent with previously described.<sup>3</sup>

---

### **3.3 Ub-NCL, His<sub>6</sub>-LLLPEGL-Ub, nanobody-NCL-His<sub>6</sub>, His<sub>6</sub>-LLLPEGL-GFP expression and purification**

Ub-NCL (vector: pET28a) and His<sub>6</sub>-LLLPEGL-Ub (vector: pET28a) were prepared using a method similar to that for Ub.<sup>4</sup> The Ub-NCL was purified by HPLC, and the His<sub>6</sub>-LLLPEGL-Ub was purified by a Ni-NTA affinity column. The nanobody-NCL-His<sub>6</sub> (vector pET-22b(+)) was prepared using a method similar to that for nanobody-LPETG-His<sub>6</sub>.<sup>5</sup> The nanobody-NCL-His<sub>6</sub> was refolded through stepwise dialysis into a PBS buffer containing 4 M, 2 M, and 0 M urea concentrations. Subsequently, the nanobody-NCL-His<sub>6</sub> separated by size exclusion column chromatography. His<sub>6</sub>-LLLPEGL-GFP was prepared using a method similar to that for EGFP.<sup>6</sup>

## **4. Sortase A-mediated hydrazinolysis reaction and OaAEP1-mediated ligation.**

### **4.1 Hydrazinolysis of model peptides**

Enzyme-mediated hydrazinolysis reaction were conducted in HEPES buffer containing 1 mM CaCl<sub>2</sub> at pH 7.0 and 37 °C, for various time courses, (molar ratios: YA(L)<sub>n</sub>PETGLTAPEY/NH<sub>2</sub>NH<sub>2</sub> = 1/40, n=1/2/3). The reaction was terminated with 1% TFA, and the hydrazinolysis product was then monitored by analytical reversed-phase high-performance liquid chromatography (RP-HPLC) and characterized by ESI-MS.

### **4.2 Hydrazinolysis of protein**

The reactions were performed in HEPES buffer containing 1 mM CaCl<sub>2</sub> at pH 7.0 and 37 °C, for various time courses. The molar ratios of His<sub>6</sub>-LLLPEGL-protein/NH<sub>2</sub>NH<sub>2</sub> substrate were 1/40. The reactions were quenched using 6 M Guanidine·HCl (pH 3.0), and the progress of the reaction was monitored by analytical

---

RP-HPLC, followed by characterization of the ligated products using ESI-MS.

### 4.3 Protein-protein ligation

The ligation reactions were performed in PBS buffer at pH 7.0 and 25 °C, for various time courses. The molar ratios of GL-Ub/Ub-NCL substrate, and GL-GFP/nanobody-NCL-His<sub>6</sub> substrate were 1/1.5. The reactions were quenched using 6 M Guanidine·HCl (pH 3.0), and the completion of the reaction was monitored by analytical RP-HPLC, followed by characterization of the ligated products using ESI-MS. The ligation reaction between nanobody-NCL-His<sub>6</sub> and GL-GFP was analyzed by SDS-PAGE under reducing conditions.

### 4.4 Purification of hydrazinolysis and ligation proteins

Hydrazinolysed di-Ub and Ub-GFP were isolated and purified via Ni-NTA affinity chromatography. The ligated di-Ub was characterized by HPLC. In contrast, nanobody-GFP was purified using size-exclusion chromatography (SEC) in PBS (pH 7.0) and stored at -80 °C.

## 5. Supplementary figures on hydrazinolysis reaction monitoring/analysis and product characteristics

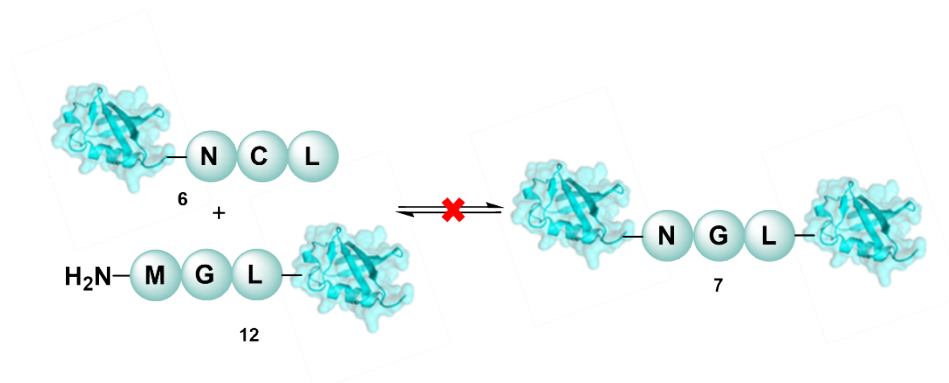

**Fig S4.** Synthetic route to 7, the blocking of the N-terminal Met in 12 hinders its reaction with 6.

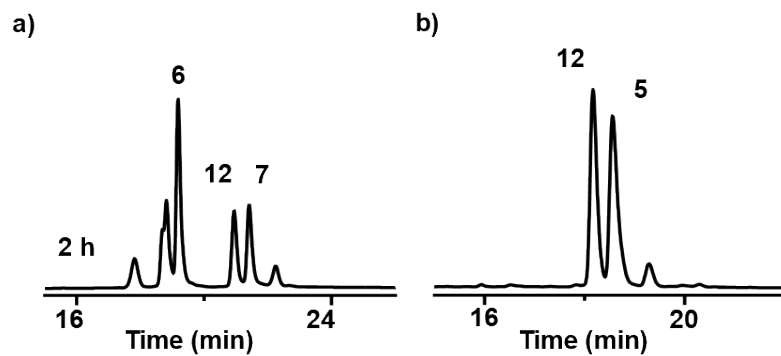

**Fig S5.** (a) HPLC analysis of reaction using a heterogeneous system of **5** and **12**. (b) HPLC analysis of a heterogeneous system of **5** and **12**.

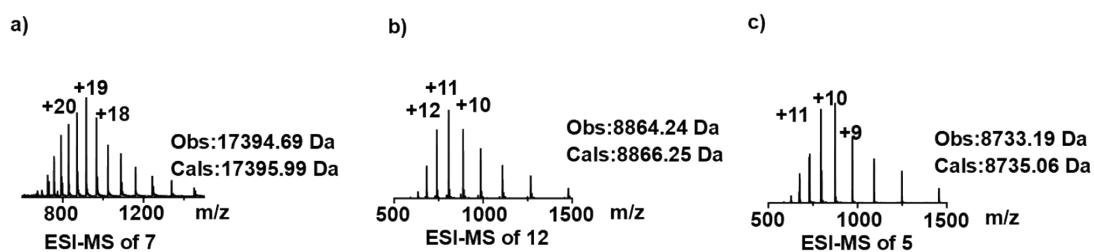

**Fig S6.** (a) ESI-MS spectrum of **7**. (b) ESI-MS spectrum of **12**. (c) ESI-MS spectrum of **5**.

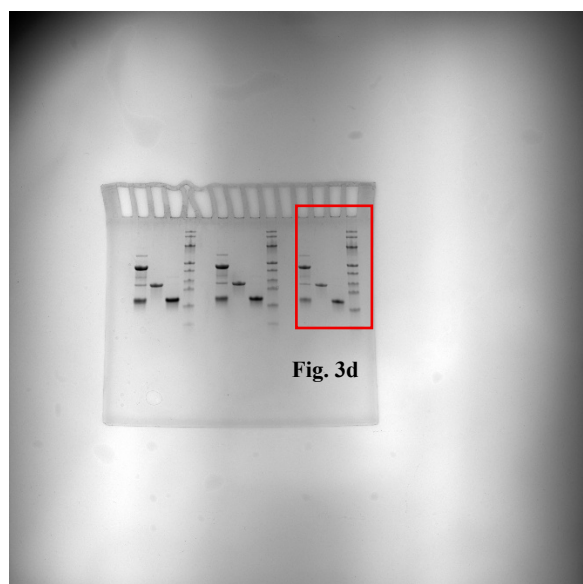

**Fig S7.** Unprocessed scans of SDS-PAGE gels with the cropped areas highlighted in boxes.

---

## References

- (1)→M. L. Bentley, E. C. Lamb and D. G. McCafferty, *J. Biol. Chem.*, 2008, **283**, (21) 14762-14771.
- (2)→Y. Li, J. Heng, D. Sun, B. Zhang, X. Zhang, Y. Zheng, W.-W. Shi, T.-Y. Wang, J.-Y. Li and X. Sun, *J. Am. Chem. Soc.*, 2021, **143**, (42) 17566-17576.
- (3)→M. Fottner, J. Heimgartner, M. Gantz, R. Mühlhofer, T. Nast-Kolb and K. Lang, *J. Am. Chem. Soc.*, 2022, **144**, (29) 13118-13126.
- (4)→Z. Li, Z. Tong, Q. Gong, H. Ai, S. Peng, C. Chen, G.-C. Chu and J.-B. Li, *Chem. Sci.*, 2023, **14**, (21) 5681-5688.
- (5)→Y. M. Li, Y. T. Li, M. Pan, X. Q. Kong, Y. C. Huang, Z. Y. Hong and L. Liu, *Angew. Chem.*, 2014, **126**, (8) 2230-2234.
- (6)→C. Zuo, R. Ding, X. Wu, Y. Wang, G. C. Chu, L. J. Liang, H. Ai, Z. B. Tong, J. Mao and Q. Zheng, *Angew. Chem. Int. Ed.*, 2022, **61**(28): e202201887.
